# Supplementary material
Source: publisher figshare collection journal article supplement (https://geolsoc.figshare.com/ndownloader/files/24782371)
Supplement: Supplementary file 1 [file 24782371]

**Timing of slip across the South Tibetan detachment system and Yadong-Gulu rift graben, Eastern Himalaya**

**Supplemental Data**

Hanwen Dong1, 2, Kyle Larson2, Dawn Kellett3, Zhiqin Xu4, Guangwei Li4, Hui Cao1, Zhiyu Yi1, Lingsen Zeng1

**Contents of this file**

Table S1

Table S2

Table S3

Table S4

Table S5

Table S6

Table S7

Table S1 Zircon LA-MC-ICPMS U-Pb Isotopic Data

– Available as a separate .xls file

Table S2 40Ar/39Ar analytical data of sample KY4-4-1

– Available as a separate .xls file

Table S3 40Ar/39Ar analytical data of sample KY2-2-4

– Available as a separate .xls file

Table S4 Apatite fission track data

– Available as a separate .xls file

Table S5 Zircon (U-Th)/He data

– Available as a separate .xls file

Table S6 Apatite (U-Th)/He data

– Available as a separate .xls file

Table S7 Yadong thermochron HeFTy models

– Available as a separate .xls file
